# Supplementary material
Source: PubMed Central journal article supplement (PMC2715731)
Supplement: supp_191_15_4750__1.pdf [file supp_191_15_4750__1.pdf]

SUPPLEMENTARY TABLE S1. Protein sequences used for phylogenetic tree predictions.

| <b>Host species</b>                                            | <b>Location</b>   | <b>TraD</b> | <b>TraB</b> | <b>TraF</b> |
|----------------------------------------------------------------|-------------------|-------------|-------------|-------------|
| <i>Aeromonas hydrophila</i>                                    | pRA1              |             |             |             |
| <i>Yersinia ruckeri</i>                                        | pYR1              | ABO40892    | ABO40993    | ABO40986    |
| <i>Yersinia pestis</i> IP275                                   | pIP1202           | ABO42193    | ABO42213    | ABO42096    |
| <i>Photobacterium damsela</i> subsp. <i>piscicida</i> PT99-018 | pP99-018          | BAF38074    | BAF38084    | BAF38150    |
| <i>Photobacterium damsela</i> subsp. <i>piscicida</i> USA91278 | pP91278           | BAF38253    | BAF38263    | BAF38329    |
| <i>Salmonella</i> Newport SL254                                | pSN254            | ABO41170    | ABO41084    | ABO41187    |
| <i>Aeromonas salmonicida</i> subsp. <i>salmonicida</i> A449    | pAsa4             | ABO92466    | ABO92458    | ABO92366    |
| <i>Proteus mirabilis</i> HI4320                                | (Chr.)            | CAR44883    | CAR44866    | CAR44809    |
| <i>Photobacterium damsela</i> subsp. <i>piscicida</i> PC554.2  | ICEPdaSpa1 (Chr.) | CAQ34963    | CAQ34970    | CAQ35005    |
| <i>Vibrio cholerae</i> B33                                     | (Chr.)            | EAZ78287    | EAZ78256    | EAZ77415    |
| <i>Providencia rettgeri</i>                                    | R391 (Chr.)       | AAM08004    | AAM08009    | AAM08018    |
| <i>Shewanella</i> sp. W3-18-1                                  | (Chr.)            | ABM23949    | ABM23957    | ABM24016    |
| <i>Vibrio cholerae</i>                                         | SXT (Chr.)        | AAL59680    | AAL59682    | AAL59678    |
| <i>Pseudomonas resinovorans</i>                                | pCAR1             | BAC41643    | BAC41650    | BAC41668    |
