# Supplementary material
Source: PubMed Central journal article supplement (PMC2715731)
Supplement: supp_191_15_4750__2.pdf [file supp_191_15_4750__2.pdf]

SUPPLEMENTARY TABLE S2. Transfer of different IncA/C plasmids to *E. coli* DH10B in comparison to the IncF plasmid pCVM29188\_146.

| <b>Strain</b>                                | <b>Plasmid</b> | <b>Transfer<sup>a</sup></b> |
|----------------------------------------------|----------------|-----------------------------|
| <i>Aeromonas hydrophila</i>                  | pRA1           | 9.2 x 10 <sup>-3</sup>      |
| <i>Escherichia coli</i> D7-3                 | pRAx           | -                           |
| <i>Yersinia ruckeri</i> YR71                 | pYR1           | 5.0 x 10 <sup>-2</sup>      |
| <i>Salmonella enterica</i> Newport SL254     | pSN254         | -                           |
| <i>Salmonella enterica</i> Heidelberg N418   | pN418          | 2.9 x 10 <sup>-3</sup>      |
| <i>Salmonella enterica</i> Kentucky CVM29188 | pCVM29188_146  | 3.0 x 10 <sup>-4</sup>      |

<sup>a</sup> Transconjugants per colony-forming units of donor.
