# Supplementary material
Source: PubMed Central journal article supplement (PMC2715731)
Supplement: supp_191_15_4750__3.pdf [file supp_191_15_4750__3.pdf]

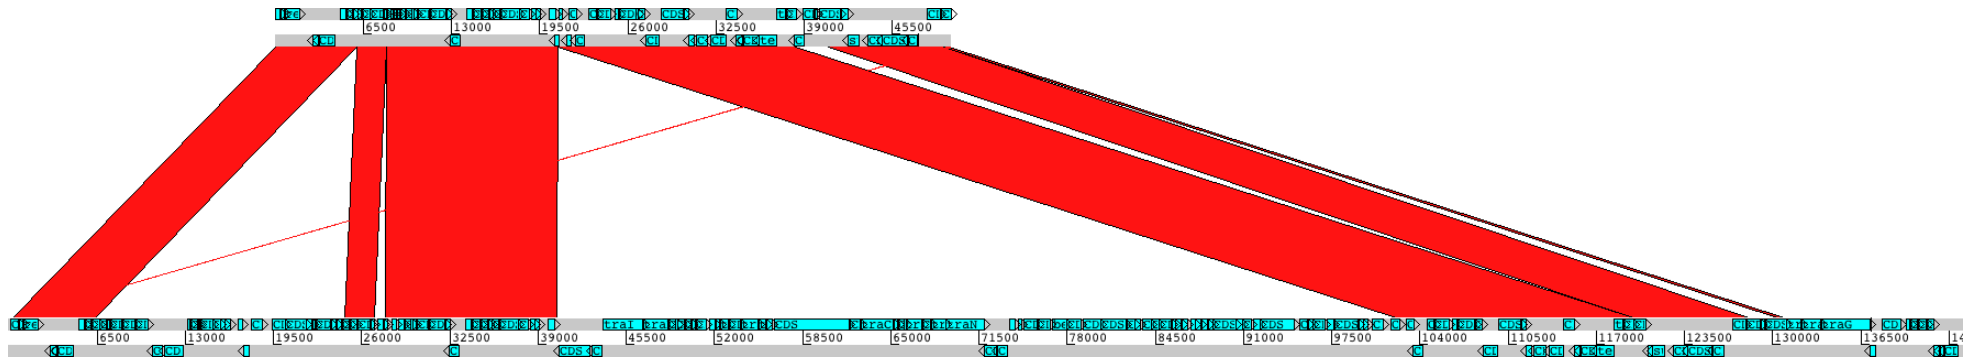

**SUPPLEMENTARY FIGURE.** BLAST comparison of pRax (top) and pRA1 (bottom), using the Artemis Comparison Tool (ACT).
